# Supplementary material
Source: PubMed Central journal article supplement (PMC8165741)
Supplement: NIHMS1702402-supplement-Supplement.pdf [file NIHMS1702402-supplement-Supplement.pdf]

## Supplementary Material\*

Wadhera RK, Joynt Maddox KE, Desai NR, et al. Evaluation of Hospital Performance Using the Excess Days in Acute Care Measure in the Readmissions Reduction Program. *Ann Intern Med.* 13 October 2020 [Epub ahead of print]. doi:10.7326/M20-3486

### *Supplement.* **Supplemental Material**

*Supplement Table 1.* **Comparison of the Readmission and EDAC Measures**

*Supplement Table 2.* **Characteristics of Hospitals Participating in the Hospital Readmissions Reduction Program by Condition in Fiscal Year 2019**

*Supplement Table 3.* **Change in Penalty Status using the Readmission vs. EDAC Measures for Heart Failure by Hospital Characteristics**

*Supplement Table 4.* **Change in Penalty Status using the Readmission vs. EDAC Measures for Acute Myocardial Infarction by Hospital Characteristics**

*Supplement Table 5.* **Change in Penalty Status using the Readmission vs. EDAC Measures for Pneumonia by Hospital Characteristics**

*Supplement Figure 1.* **Hospital Performance on the Readmission and EDAC Measures by Condition**

*Supplement Figure 2.* **Change in Penalty Status with the EDAC Measure under the HRRP**

\* This supplementary material was provided by the authors to give readers further details on their article. The material was reviewed but not copyedited.

**Supplement Table 1. Comparison of the Readmission and EDAC Measures**

|                                               | <b>30-Day Readmission Measure</b>                                                    | <b>EDAC Measure</b>                                                          |
|-----------------------------------------------|--------------------------------------------------------------------------------------|------------------------------------------------------------------------------|
| <b>Encounters within 30-days of discharge</b> | Unplanned readmissions                                                               | ED treat-and-discharge visits<br>Observation Stays<br>Unplanned readmissions |
| <b>Measures</b>                               | Readmission (yes vs. no)                                                             | Total days in (above) acute care settings                                    |
| <b>Risk Adjustment for hospital case mix</b>  | Yes                                                                                  | Yes                                                                          |
| <b>Includes repeat visits</b>                 | No                                                                                   | Yes                                                                          |
| <b>Accounts for competing risk of death</b>   | No                                                                                   | Yes                                                                          |
| <b>Hospital-Level Calculation</b>             | Number of unplanned readmissions per 100 discharges (%)                              | Excess # of days in acute care (predicted minus expected) per 100 discharges |
| <b>Interval Estimate</b>                      | 95% Confidence interval                                                              | 95% Credible interval                                                        |
| <b>Conditions</b>                             | Heart failure<br>Acute myocardial infarction<br>Pneumonia<br>COPD<br>CABG<br>THA/TKA | Heart failure<br>Acute myocardial infarction<br>Pneumonia                    |

**Supplement Table 2. Characteristics of Hospitals Participating in the Hospital Readmissions Reduction Program by Condition in Fiscal Year 2019**

|                          | <b>Heart Failure<br/>(n=2,845)</b> | <b>Acute Myocardial<br/>Infarction<br/>(n=2,055)</b> | <b>Pneumonia<br/>(n=2,911)</b> |
|--------------------------|------------------------------------|------------------------------------------------------|--------------------------------|
| <b>Hospital size</b>     |                                    |                                                      |                                |
| Small (<200 beds)        | 57.5                               | 43.6                                                 | 58.4                           |
| Medium (200-399 beds)    | 27.2                               | 35.8                                                 | 26.6                           |
| Large (>400 beds)        | 15.3                               | 20.7                                                 | 15.0                           |
| <b>Ownership</b>         |                                    |                                                      |                                |
| Public                   | 13.9                               | 9.7                                                  | 14.7                           |
| Private for-profit       | 21.2                               | 21.6                                                 | 21.1                           |
| Private not-for-profit   | 64.9                               | 68.7                                                 | 64.2                           |
| <b>Teaching status</b>   |                                    |                                                      |                                |
| Non-teaching             | 40.0                               | 37.9                                                 | 48.7                           |
| Teaching                 | 60.0                               | 62.1                                                 | 51.3                           |
| <b>Safety-net status</b> |                                    |                                                      |                                |
| Non-safety-net           | 80.0                               | 83.5                                                 | 79.5                           |
| Safety-net               | 20.0                               | 16.5                                                 | 20.5                           |
| <b>Location</b>          |                                    |                                                      |                                |
| Non-Rural                | 74.5                               | 85.8                                                 | 73.8                           |
| Rural                    | 25.5                               | 14.2                                                 | 26.2                           |
| <b>U.S. Region</b>       |                                    |                                                      |                                |
| Northeast                | 16.2                               | 18.5                                                 | 16.0                           |
| Midwest                  | 24.2                               | 23.8                                                 | 23.9                           |
| South                    | 41.2                               | 38.4                                                 | 41.3                           |
| West                     | 18.4                               | 19.2                                                 | 18.9                           |

Hospital characteristics (except safety-net status) were not available for 28 hospitals for heart failure, 17 hospitals for myocardial infarction, and 32 hospitals for pneumonia. Safety-net hospitals were defined as those in the highest quintile of total Medicare hospital stays for which patients were dually enrolled in Medicare and Medicaid.

**Supplement Table 3. Change in Penalty Status using the Readmission vs. EDAC Measures for Heart Failure by Hospital Characteristics**

|                         | <b>Penalized by<br/>neither measure</b> | <b>Penalized by<br/>EDAC, but not<br/>readmission<br/>measure</b> | <b>Penalized by<br/>readmission,<br/>but not EDAC<br/>measure</b> | <b>Penalized by<br/>both measures</b> |
|-------------------------|-----------------------------------------|-------------------------------------------------------------------|-------------------------------------------------------------------|---------------------------------------|
| <b>No. of Hospitals</b> | 1041                                    | 382                                                               | 387                                                               | 1035                                  |
| <b>Hospital size</b>    |                                         |                                                                   |                                                                   |                                       |
| Large (>400 beds)       | 12.6%                                   | 28.2%                                                             | 1.8%                                                              | 18.4%                                 |
| Medium (200-399 beds)   | 24.1%                                   | 28.4%                                                             | 16.8%                                                             | 33.8%                                 |
| Small (<200 beds)       | 63.3%                                   | 43.4%                                                             | 81.4%                                                             | 47.9%                                 |
| <b>Ownership</b>        |                                         |                                                                   |                                                                   |                                       |
| Public                  | 13.6%                                   | 15.5%                                                             | 15.4%                                                             | 13.0%                                 |
| Private for-profit      | 15.6%                                   | 15.8%                                                             | 26.4%                                                             | 27.0%                                 |
| Private not-for-profit  | 70.8%                                   | 68.7%                                                             | 58.1%                                                             | 60.1%                                 |
| <b>Teaching</b>         | 49.6%                                   | 65.8%                                                             | 36.1%                                                             | 55.2%                                 |
| <b>Safety-Net</b>       | 19.7%                                   | 20.7%                                                             | 20.4%                                                             | 19.8%                                 |
| <b>Rural</b>            | 30.6%                                   | 17.1%                                                             | 35.9%                                                             | 19.4%                                 |
| <b>U.S. Region</b>      |                                         |                                                                   |                                                                   |                                       |
| Northeast               | 12.8%                                   | 18.2%                                                             | 11.5%                                                             | 20.7%                                 |
| Midwest                 | 30.9%                                   | 19.5%                                                             | 26.4%                                                             | 18.3%                                 |
| South                   | 32.8%                                   | 40.5%                                                             | 43.5%                                                             | 49.0%                                 |
| West                    | 23.5%                                   | 21.8%                                                             | 18.6%                                                             | 12.0%                                 |

**Supplement Table 4. Change in Penalty Status using the Readmission vs. EDAC Measures for Acute Myocardial Infarction by Hospital Characteristics**

|                         | <b>Penalized by<br/>neither measure</b> | <b>Penalized by<br/>EDAC, but not<br/>readmission<br/>measure</b> | <b>Penalized by<br/>readmission,<br/>but not EDAC<br/>measure</b> | <b>Penalized by<br/>both measures</b> |
|-------------------------|-----------------------------------------|-------------------------------------------------------------------|-------------------------------------------------------------------|---------------------------------------|
| <b>No. of Hospitals</b> | 740                                     | 289                                                               | 292                                                               | 734                                   |
| <b>Hospital size</b>    |                                         |                                                                   |                                                                   |                                       |
| Large (>400 beds)       | 18.5%                                   | 27.9%                                                             | 12.1%                                                             | 23.5%                                 |
| Medium (200-399 beds)   | 35.4%                                   | 32.1%                                                             | 33.4%                                                             | 38.5%                                 |
| Small (<200 beds)       | 46.1%                                   | 40.1%                                                             | 54.5%                                                             | 38.0%                                 |
| <b>Ownership</b>        |                                         |                                                                   |                                                                   |                                       |
| Public                  | 9.6%                                    | 11.1%                                                             | 8.6%                                                              | 9.7%                                  |
| Private for-profit      | 16.1%                                   | 21.6%                                                             | 22.8%                                                             | 26.7%                                 |
| Private not-for-profit  | 74.2%                                   | 67.2%                                                             | 68.6%                                                             | 63.7%                                 |
| <b>Teaching</b>         | 62.3%                                   | 61.3%                                                             | 59.3%                                                             | 63.3%                                 |
| <b>Safety-Net</b>       | 16.2%                                   | 17.3%                                                             | 17.5%                                                             | 16.1%                                 |
| <b>Rural</b>            | 17.1%                                   | 11.1%                                                             | 18.3%                                                             | 10.8%                                 |
| <b>U.S. Region</b>      |                                         |                                                                   |                                                                   |                                       |
| Northeast               | 14.2%                                   | 20.9%                                                             | 16.2%                                                             | 22.9%                                 |
| Midwest                 | 29.3%                                   | 19.2%                                                             | 25.9%                                                             | 19.3%                                 |
| South                   | 29.2%                                   | 40.8%                                                             | 41.7%                                                             | 45.4%                                 |
| West                    | 27.3%                                   | 19.2%                                                             | 16.2%                                                             | 12.3%                                 |

**Supplement Table 5. Change in Penalty Status using the Readmission vs. EDAC Measures for Pneumonia by Hospital Characteristics**

|                         | <b>Penalized by<br/>neither measure</b> | <b>Penalized by<br/>EDAC, but not<br/>readmission<br/>measure</b> | <b>Penalized by<br/>readmission,<br/>but not EDAC<br/>measure</b> | <b>Penalized by<br/>both measures</b> |
|-------------------------|-----------------------------------------|-------------------------------------------------------------------|-------------------------------------------------------------------|---------------------------------------|
| <b>No. of Hospitals</b> | 1095                                    | 362                                                               | 362                                                               | 1092                                  |
| <b>Hospital size</b>    |                                         |                                                                   |                                                                   |                                       |
| Large (>400 beds)       | 8.8%                                    | 26.8%                                                             | 3.1%                                                              | 21.2%                                 |
| Medium (200-399 beds)   | 21.3%                                   | 26.5%                                                             | 19.4%                                                             | 34.3%                                 |
| Small (<200 beds)       | 69.9%                                   | 46.6%                                                             | 77.5%                                                             | 44.5%                                 |
| <b>Ownership</b>        |                                         |                                                                   |                                                                   |                                       |
| Public                  | 16.4%                                   | 16.2%                                                             | 14.9%                                                             | 12.3%                                 |
| Private for-profit      | 17.9%                                   | 17.9%                                                             | 21.9%                                                             | 25.2%                                 |
| Private not-for-profit  | 65.7%                                   | 65.9%                                                             | 63.2%                                                             | 62.5%                                 |
| <b>Teaching</b>         | 44.6%                                   | 59.2%                                                             | 38.5%                                                             | 59.6%                                 |
| <b>Safety-Net</b>       | 20.2%                                   | 21.5%                                                             | 21.5%                                                             | 20.1%                                 |
| <b>Rural</b>            | 34.3%                                   | 21.8%                                                             | 35.4%                                                             | 16.5%                                 |
| <b>U.S. Region</b>      |                                         |                                                                   |                                                                   |                                       |
| Northeast               | 11.3%                                   | 17.3%                                                             | 14.0%                                                             | 21.0%                                 |
| Midwest                 | 27.9%                                   | 18.4%                                                             | 25.8%                                                             | 21.0%                                 |
| South                   | 35.8%                                   | 42.7%                                                             | 42.7%                                                             | 45.8%                                 |
| West                    | 25.1%                                   | 21.5%                                                             | 17.4%                                                             | 12.2%                                 |

# Supplement Figure 1. Hospital Performance on the Readmission and Excess Days in Acute Care Measures by Condition

## a. Heart Failure

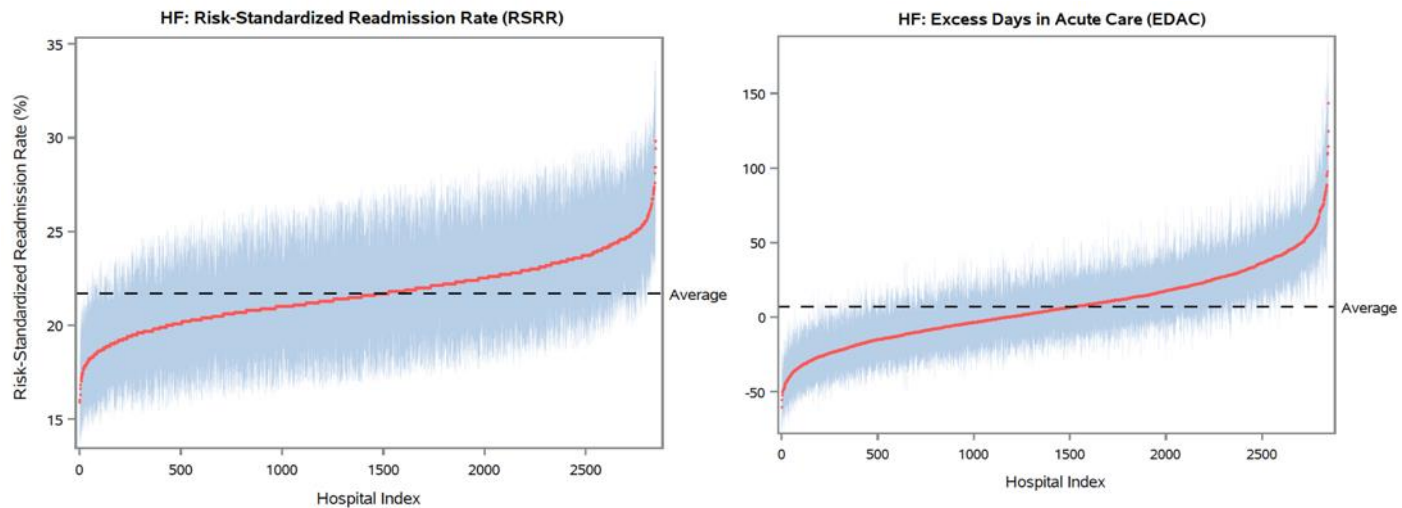

## b. Acute myocardial infarction

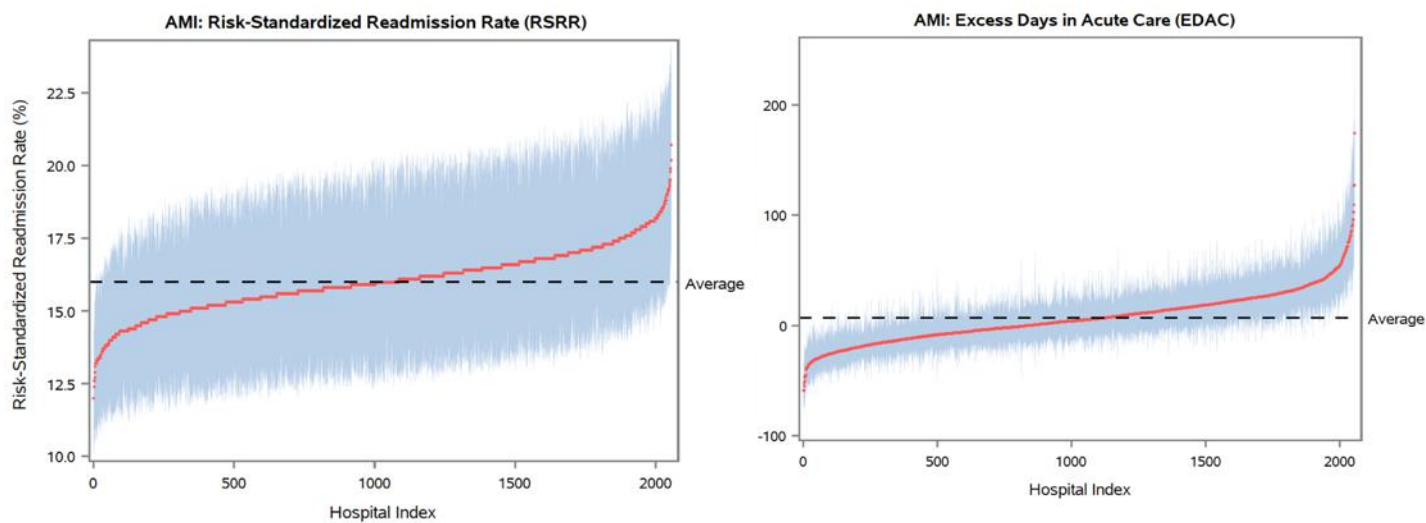

### c. Pneumonia

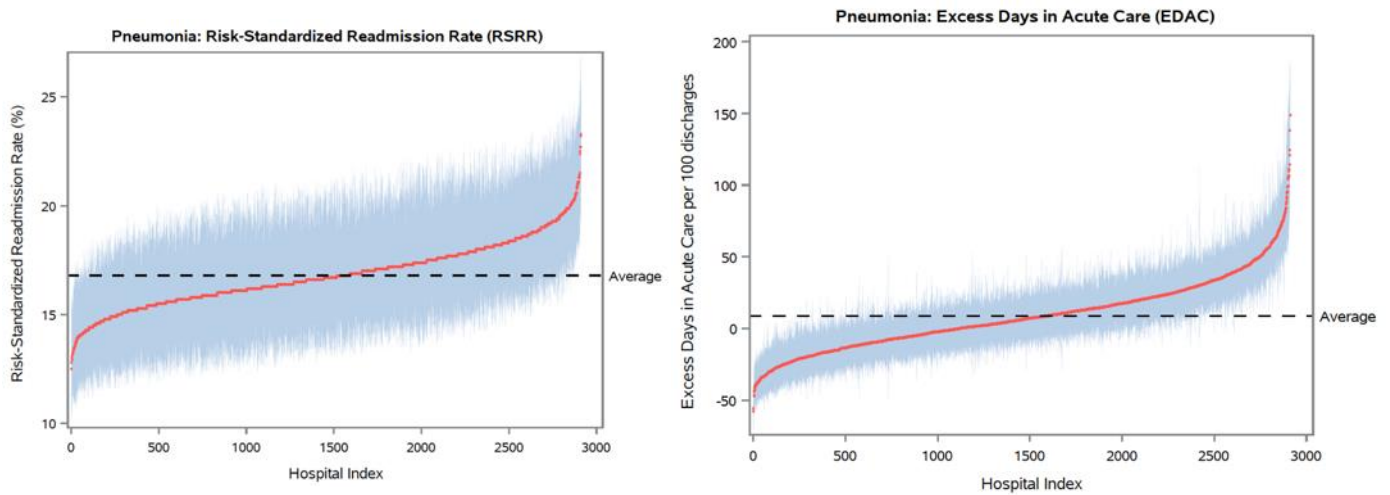

On the left, Panels A-C show hospital-level point estimates (red) and 95% confidence intervals (blue) for the 30-day risk-standardized readmissions by condition. On the right, point estimates (red) and 95% credible intervals (blue) are shown for the excess days in acute care measure by condition. The dashed line (black) represents the national average for hospital performance on each respective measure.



**Supplement Figure 2. Change in Penalty Status with the EDAC Measure under the HRRP**

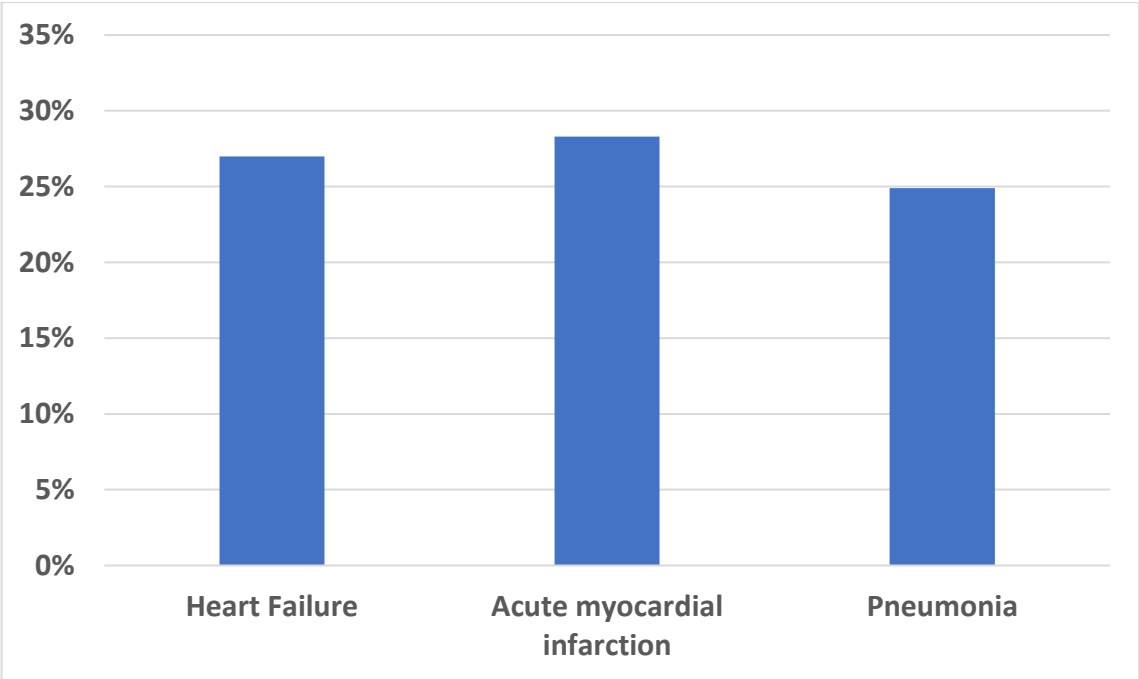

Figure shows the proportion of all hospitals that would experience any change in condition-specific penalty status if the EDAC measure were used instead of the readmission measure under the HRRP.
